# Supplementary material
Source: Springer Nature journal article supplement (https://www.springermedizin.de/resource/supplementary/13058_2008_2173_MOESM3_ESM.pdf/9700810)

MCF7N-VEC

MCF7N-MEK5

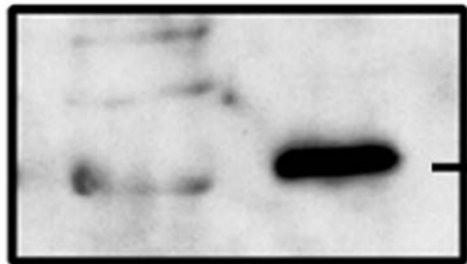

MEK5

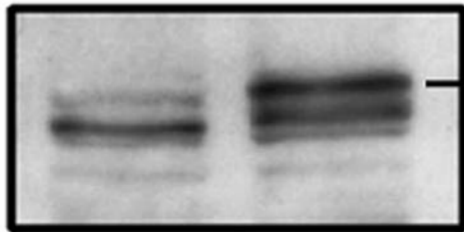

Erk5

Supplement: MOESM3 [file 9700810]
